# Supplementary material for: DFT investigation of NH3 physisorption on CuSO4 impregnated SiO2
Source: Royal Society of Chemistry journal article supplement (doi:10.1039/c2cp22539e), 2012-01-01
Supplement: c2cp22539e.pdf [file c2cp22539e.pdf]

## ELECTRONIC SUPPLEMENTARY INFORMATION

### DFT Investigation of NH<sub>3</sub> Physisorption on CuSO<sub>4</sub> Impregnated SiO<sub>2</sub>

Jyothirmai Ambati‡, Hamzah Saiyed and Stephen E. Rankin\*

*Department of Chemical and Materials Engineering,*

*University of Kentucky, Lexington, Kentucky 40506-0046*

\* Corresponding author: Tel: +1-859-257-9799; Fax: +1-859-323-1929; e-mail:

srankin@engr.uky.edu

‡ Current address: REC Technology US Inc., 1159 Triton Drive, Foster City, CA.

**Table S-1** Energy of complexation (for reaction  $\text{SSQ} + \text{CS} \rightarrow \text{SSQ}\cdot\text{CS}$ ) of optimized SiO<sub>2</sub>/CuSO<sub>4</sub> complexes with variable final position of the Cu<sup>2+</sup> and SO<sub>4</sub><sup>2-</sup> ions. See Fig. S-1 for the corresponding geometries.

| SiO <sub>2</sub> /CuSO <sub>4</sub> Structure | Total Energy (kJ/mol) |
|-----------------------------------------------|-----------------------|
| SSQ•CS                                        | -213.4                |
| SSQ•CS(II)                                    | -167.9                |
| SSQ•CS(III)                                   | -209.1                |
| SSQ•CS(IV)                                    | -165.7                |

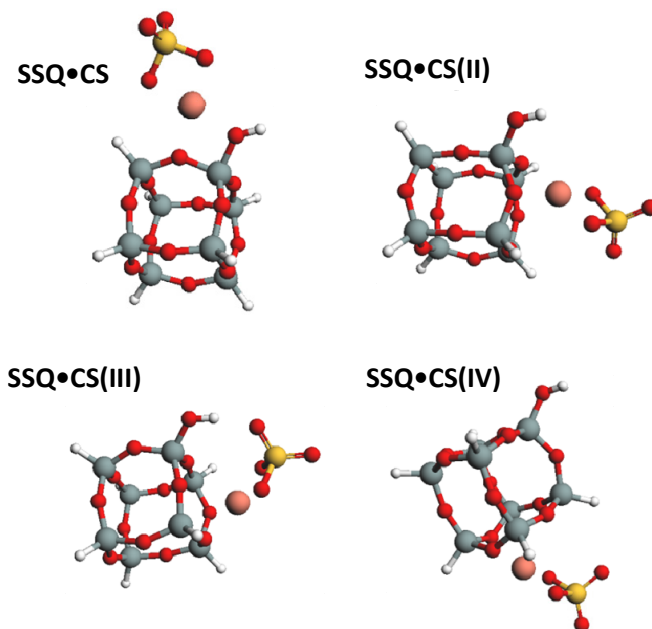

**Fig. S-1** 3D Optimized geometries of various configurations of SSQ•CS.

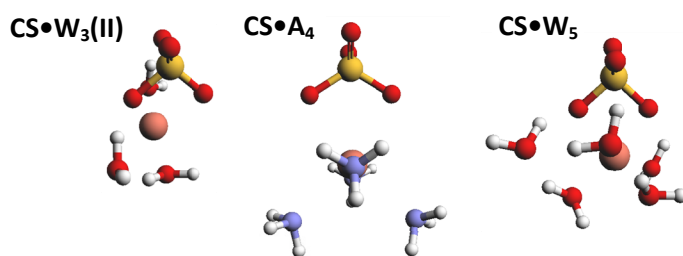

**Fig. S-2** Structures demonstrating the influence of hydrogen bonding in CuSO<sub>4</sub> complexed with (from left to right) 3 H<sub>2</sub>O, 4 NH<sub>3</sub>, or 5 H<sub>2</sub>O.
